# Supplementary material for: Nonvolatile memory devices based on polyimides bearing noncoplanar twisted biphenyl units containing carbazole and triphenylamine side-chain groups
Source: Royal Society of Chemistry journal article supplement (doi:10.1039/c1jm12453f), 2011-01-01
Supplement: c1jm12453f.pdf [file c1jm12453f.pdf]

Supplementary Material (ESI) for Journal of Materials Chemistry  
This journal is (C) The Royal Society of Chemistry 2011

# Nonvolatile Memory Devices Based on Polyimides Bearing Noncoplanar Twisted Biphenyl Units Containing Carbazole and Triphenylamine Side-chain Groups

Yue-Qin Li,<sup>a,b</sup> Run-Chen Fang,<sup>b</sup> An-Min Zheng,<sup>c</sup> Yue-Ying Chu,<sup>c</sup> Xian Tao,<sup>a</sup> Hui-Hua Xu,<sup>a</sup> Shi-Jin Ding,<sup>b</sup> Ying-Zhong Shen<sup>\*a,b</sup>

<sup>a</sup>Applied Chemistry Department, School of Material Science & Engineering, Nanjing University of Aeronautics & Astronautics, Nanjing, 210016, P. R. China

<sup>b</sup>State Key Laboratory of ASIC and System, School of Microelectronics, Fudan University, Shanghai, 200433, P. R. China

<sup>c</sup>State Key Laboratory Magnetic Resonance and Atomic Molecular Physics, Wuhan Centre for Magnetic Resonance, Wuhan Institute of Physics and Mathematics, Chinese Academy of Science, Wuhan 430071, P. R. China

\*E-mail: yz\_shen@nuaa.edu.cn (Y.-Z. S.)

Supplementary Material (ESI) for Journal of Materials Chemistry  
This journal is (C) The Royal Society of Chemistry 2011

## Content

1. AFM images of polyimide films coated on ITO glass
2. FT-IR spectra of CzBD and TPABD
3.  $^1\text{H}$  NMR and  $^{13}\text{C}$  NMR spectra of CzBD
4.  $^1\text{H}$  NMR and  $^{13}\text{C}$  NMR spectra of TPABD
5. DSC curves of PI(CzBD-BTFBPDA) and PI(TPABD-BTFBPDA)
6. (a) *I-V* curves of ten Al/PI(CzBD-BTFBPDA)/ITO cells at the SET and RESET operation. (b) The resistance distribution of the high and low conductivity state.
7. (a) *I-V* curves of ten Al/PI(TPABD-BTFBPDA)/ITO cells at the SET and RESET operation. (b) The resistance distribution of the high and low conductivity state. (c) Endurance characteristic of the Al/PI(TPABD-BTFBPDA)/ITO cell. The resistance ratios of high resistance state to low resistance state are more than  $10^5$  during the 1000 cycles of fatigued test.

Supplementary Material (ESI) for Journal of Materials Chemistry  
This journal is (C) The Royal Society of Chemistry 2011

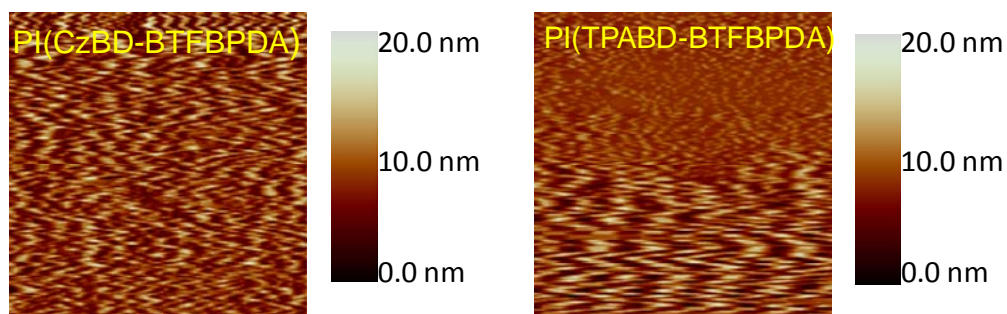

**Figure S1.** AFM images of polyimide films coated on ITO glass. The image size was of  $1\ \mu\text{m} \times 1\ \mu\text{m}$ . The Z-range for PI(CzBD-BTFBPDA) and PI(TPABD-BTFBPDA) are 10.7, 9.4 nm, respectively. Their corresponding roughnesses are determined to be 12.2 and 6.0 nm, respectively.

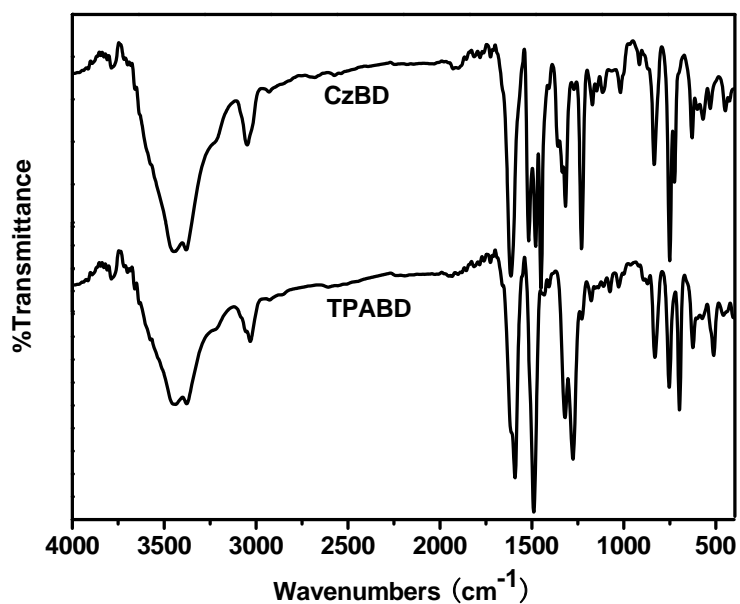

**Figure S2.** FT-IR spectra of CzBD and TPABD.

Supplementary Material (ESI) for Journal of Materials Chemistry  
This journal is (C) The Royal Society of Chemistry 2011

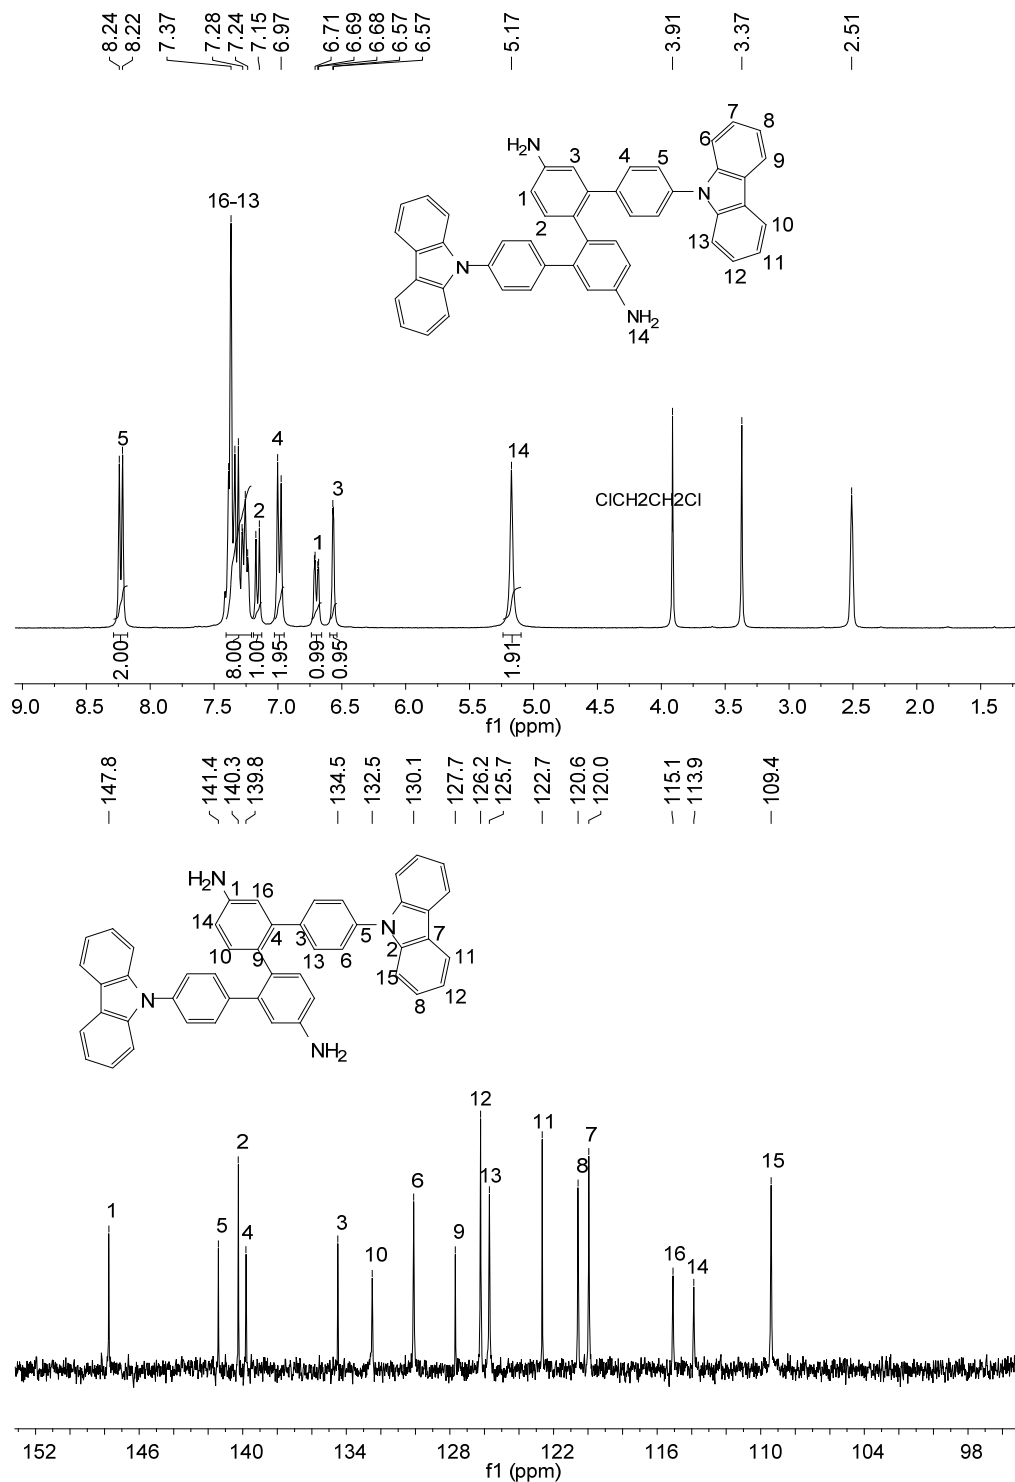

Figure S3.  $^1\text{H}$  NMR and  $^{13}\text{C}$  NMR spectra of CzBD.

Supplementary Material (ESI) for Journal of Materials Chemistry  
This journal is (C) The Royal Society of Chemistry 2011

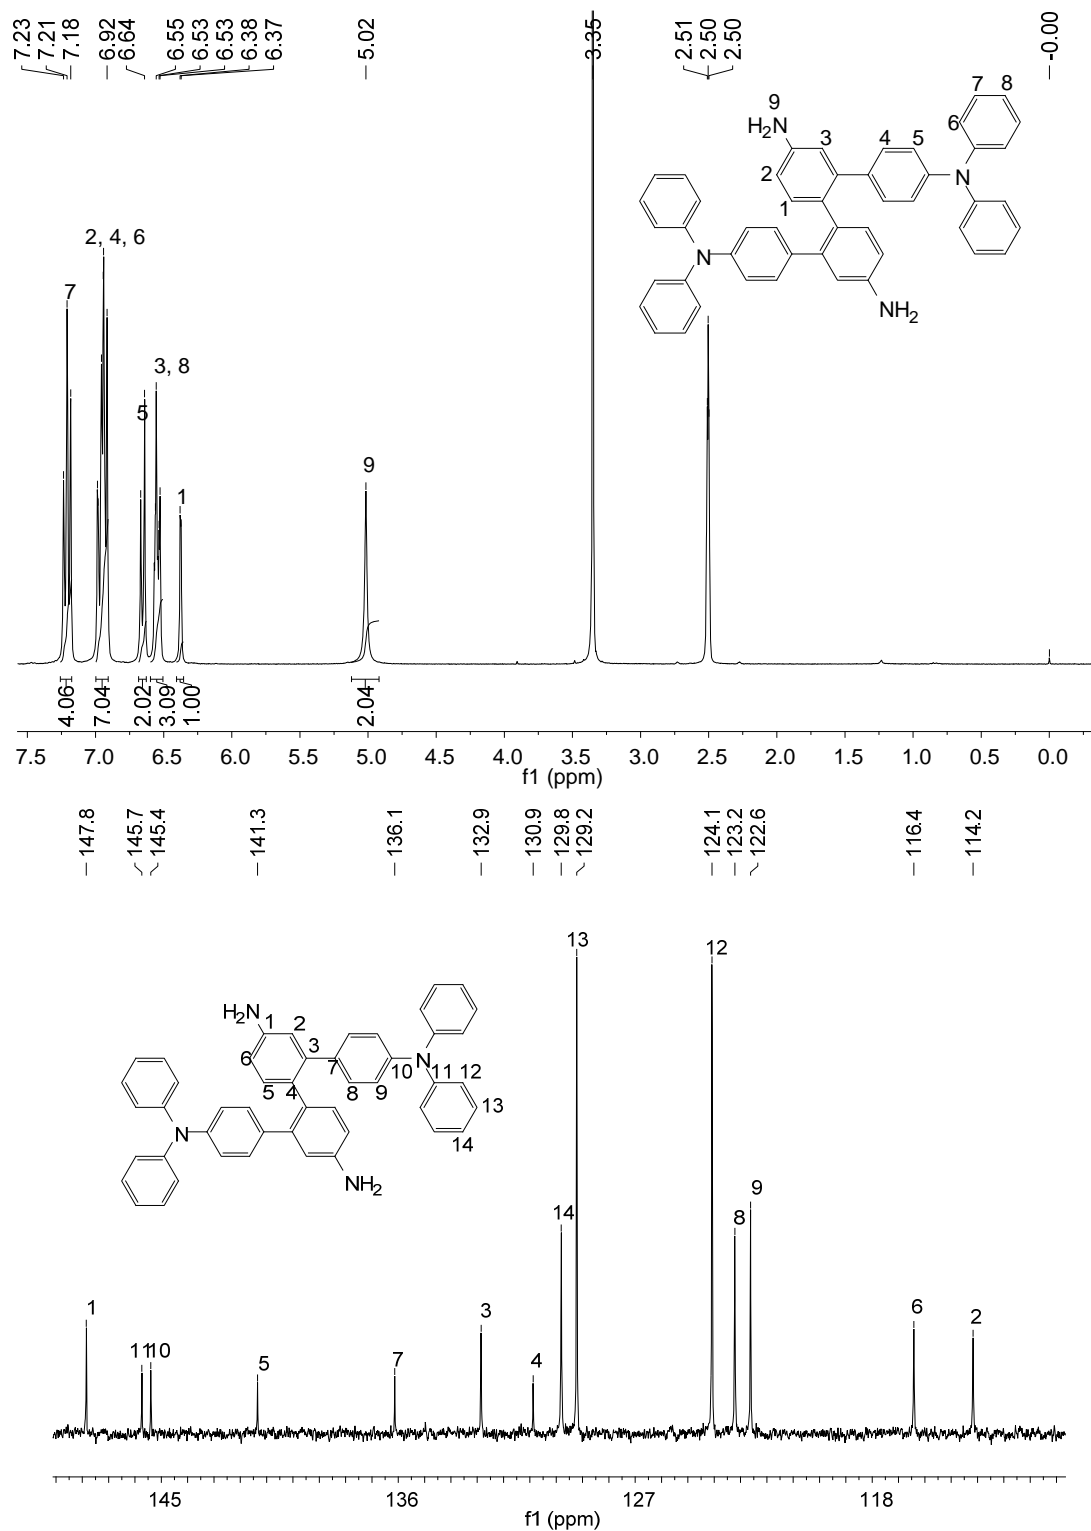

Figure S4.  $^1\text{H}$  NMR and  $^{13}\text{C}$  NMR spectra of TPABD.

Supplementary Material (ESI) for Journal of Materials Chemistry  
This journal is (C) The Royal Society of Chemistry 2011

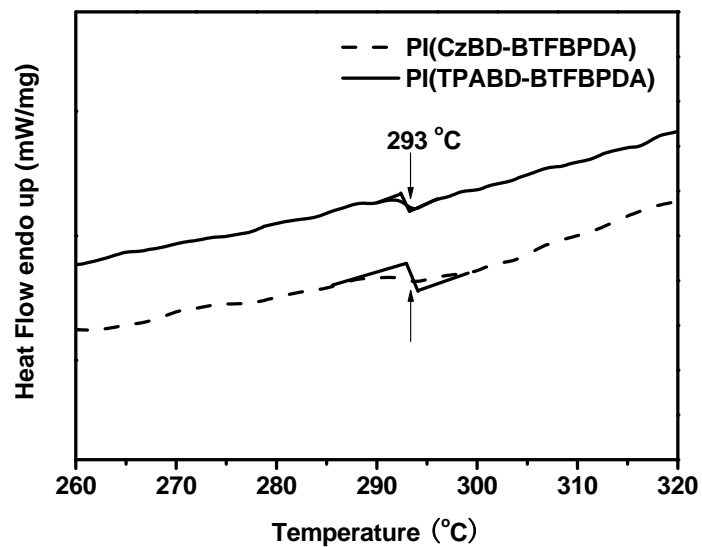

**Figure S5.** DSC curves of PI(CzBD-BTFBPDA) and PI(TPABD-BTFBPDA).

Supplementary Material (ESI) for Journal of Materials Chemistry  
This journal is (C) The Royal Society of Chemistry 2011

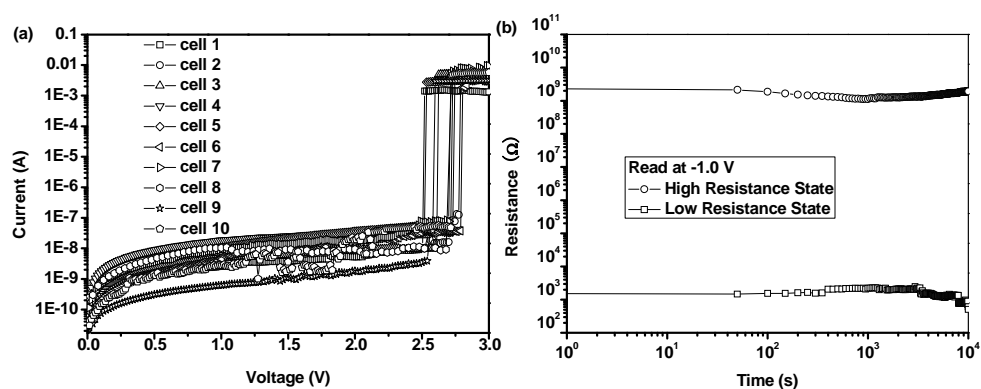

**Figure S6.** (a) *I-V* curves of ten Al/PI(CzBD-BTFBPDA)/ITO cells at the SET operation. (b) The resistance distribution of the high and low conductivity state.

Supplementary Material (ESI) for Journal of Materials Chemistry  
This journal is (C) The Royal Society of Chemistry 2011

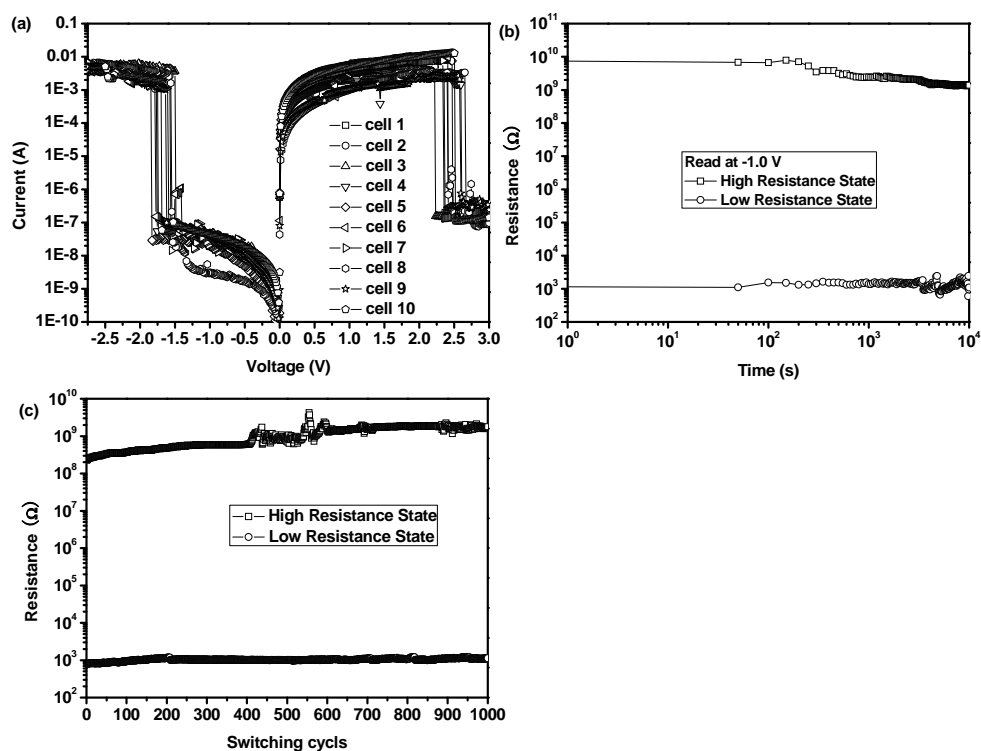

**Figure S7.** (a) *I-V* curves of ten Al/PI(TPABD-BTFBPDA)/ITO cells at the SET and RESET operation. (b) The resistance distribution of the high and low conductivity state. (c) Endurance characteristic of the Al/PI(TPABD-BTFBPDA)/ITO cell. The resistance ratios of high resistance state to low resistance state are more than  $10^5$  during the 1000 cycles of fatigued test.
